# Supplementary material for: Detection of Fruit Meals Within Laboratory-Raised and Field-Trapped Adult Drosophila suzukii (Diptera: Drosophilidae) Guts
Source: Frontiers journal article supplement (doi:10.3389/fevo.2021.719645), 2021-08-23
Supplement: Table_1.XLSX [file Table_1.XLSX]

## Sheet: Table Explanation
Supplementary Table of Primers Tested
For this table, a blank cell means that fruit or variety wasn’t tested, and a 0 means that the fruit or variety was tested and was negative (or matched the primer-dimer/junk in the negative control). “Shoulders” is the term used to describe when a peak has a few small peaks next to it or is hard to read because the product doesn’t have a clean melt curve. Interestingly, we found that the melt cur…
This table shows all the primers I tested over time. If you will be designing your own primers, I strongly suggest saving the accession number (or GenBank number) like you see in the later orders, as that makes it much easier to go back and cite later. Also, start by naming your primers with a letter and number (A01F, A01R, etc) because I didn’t realize that until letter D and also apparently don…
All of these primers have been tested on iTAQ Universal SYBR Green Supermix. Later, we realized that this test works better with the SsoAdvanced Universal SYBR Green Supermix which all the experimental samples were tested on. There is a solid possibility that simply testing all these primers again on the SsoAdvanced SYBR will reduce not only the primer-dimer and other product in the negative cont…
Towards the end of the project, I was pushing very hard to switch to a TaqMan multiplex reaction because that would reduce the time to run each QPCR if we tested multiple fruit types at each field point (we didn’t) and would turn out cheaper in the long run (if we had gotten primers for all fruit types, which did not pan out, unfortunately). The primer sets starting at letter G are all intended f…
Let’s take a moment to talk about the strawberry Albion. I’m not sure what it is about Albion that makes it tricky for DNA testing, but it is. First, I used pure plant DNA, but Albion never grouped with other strawberries. So then I fed fresh Albion fruit we had in the greenhouse to flies, and it still didn’t group similar to other strawberries. Finally, I thought it was possible our greenhouse v…

## Sheet: Primer List
Primer Name	Forward Primer	Reverse Primer	Putative (untested) probe for TaqMan	Accession Number/Notes	Test Date	Junk in the negative control	Ouachita	Von	Burbank	NC-740	Store-Bought Black	NC 759	NC 768	NC 772	NC 779	Southland	Mac Black	Store-Bought Rasp	Store-Bought Strawberry	Chandler	Radiance	festival	Camarosa	Albion	Powder Blue	Rebel	Snow Chaser	O'Neal	Abundance	Rebel	Star	Jewel	Misty	Premier	Biloxi	Jersey	Blue Crop	Duke	Blue Ray	Liberty
A04	tcctatcgccaccattaatgat	ggatagcctgggatcttaatgaa			2019-08-16	Yes	84	84		84		84	84	84	84		84		82							84
A06	tcaatatcagtagcgttttc	caattatttgataattattaagc			2019-08-16	No	78.5	78.5		78.5		78.5	78.5	78.5	78.5		78.5		77							0 (but some shoulders)
A08	aagagcaacaaatccacggg	cgggcttgcttctattggac			2019-08-16	No	78	78			78				78			78	76							80 (but some shoulders)
D01	cgttcctggagacgaaaatc	cgcaacagggattcgtagat		Specific to Vaccinium, chloroplast	2019-08-14	Yes	79	0									0										79	79	79	79	79	79	79	0	79	0	79	79	79	79
D02	gaaatcacgttgggctttgt	ccaaagatctcggtcagagc		Specific to Ericaceae, chloroplast	2019-07-10	No					80.5								0															80.5
D03	gggcattctatgggttttca	tggatccttcttggttgagc		Specific to Ericaceae, chloroplast	2019-07-10	No	0	0			0		0				0		0					0		77	77	77	77		77	77	77	77	77	77	77	77	77	77
D04	gggcattctatgggttttca	tggatccttcttggttgagc		Specific to Vaccinium, chloroplast	2019-07-10	No					0								0															0
D05	gaagcatggtgcatcctttt	agggtgggttcgattttgat			2019-07-10	No					77.5					77.5			76 with shoulders
D06	gggttcgaatccctctcttt	ggtttttgttttctttgcttga		microsatellite, chloroplast	2019-07-10	No					76 with shoulders					75 with shoulders			0
D07	ggccaccttatggttcttca	aaatcaagggaatgcttgga			2019-07-10	No					76.5					76.5			76
D09	ttcacaaacctatccgagca	aagtaatatcccggcccttg			2019-07-10	Yes					76					77			0 with shoulders
D10-1	cagcgatgcttttgttttca	ggattggatgggaatgaatg			2019-07-10	No					74.5					74.5			73.5
D11-1	atttccagcgatgcttttgt	ggattggatgggaatgaatg			2019-07-10	No					74.5					74.5			73.5
D12	aatattcggccgtatgcttg	gtcctttttccggctacctt			2019-07-10	No					78 with shoulders					78			76
D13	atattcggccgtatgcttga	gtcctttttccggctacctt			2019-07-10	No					78 with shoulders					78			76
E01	atgcattaaaaccctcgcac	tcctctcaaattaccaccgc		Black raspberry genome	2019-07-15	Yes					80							Peak with shoulders	Peak with shoulders
E02	ttgcagcctgcgaataaat	ggagtgttcagctgttgtcatatc		From Woodhead et al Functional Markers for Rsp	2019-07-15	No					77							1/3 peaks at 77	0
E03	tcgccacttgtaagattatgacg	gtgcatcagacagttagcaacttt		From Woodhead et al Functional Markers for Rsp	2019-07-15	Yes					76							76 with shoulders	76 with shoulders
E04	gtgaaggagctcaagaacgg	tttacatcacccgacaacca		RH_MEa0011dA06	2019-07-15	No					Shoulders							Shoulders	0
E05	gccaaacacaccgttatcttg	cattaccacacgcttgatgc		Rub25a	2019-07-15	No	0	0		0	Shoulders	0	0	79			79	79	0
E06	cacaaccagtcccgagaaat	gtttcatttcatccaaatgcaacc		Rub275a, Dr. Christine Bradish's thesis	2019-07-15	No					79							0	0
E07	ccatctccaattcagttcttcc	gtttagcagaatcggttcttacaagc		RubMar3F, Dr. Christine Bradish's Thesis	2019-07-15	No					79 but looks bad							0	0
E08	cttccccctataaatcccga	cgtctctctgcaattcctcc		RH_MEa0008cF01, Zurn et al	2019-07-15	No	78.5	78.5		0	78.5	0	0	0	0		0	0	0	0			0	0		0
E09	cacgagtaacactcccaaatga	gtttcttggaattggggttattctg		Ri5037, Zurn et al	2019-07-15	No					0							0	0
E10	aatcgtcgcctgcaatatttac	caaattcgacaccacctatcag		Ro942	2019-07-15	Yes					78							0	0
E11	aaagacaaggcgtccacaac	gtttggttatgctttgattaggctgg		RhM011	2019-07-15	Yes					78							0 with shoulders	0 with shoulders
E12	accagactcggttcgaagaa	gggtccaaacgagacctaca		rubus_GDR_reftransV2_0000208	2019-07-15	No					80							0	0
E13	ctccagagccaaaaggacag	cagagtggagctggttcaca		maker-Fvb3-4-augustus-gene-230.43-mRNA-1	2019-07-15	Yes					0 with shoulders							0 with shoulders	80
E14	ccatcttcttgggagctctg	agagtttctccccaccacct		maker-Fvb3-4-snap-gene-57.61-mRNA-1	2019-07-15	No					Shoulders							Shoulders	Shoulders
E15	aaatagccaccaccttgcac	gtcgtccttgtccttgtggt		maker-Fvb2-2-augustus-gene-130.25-mRNA-1	2019-07-15	No					Shoulders							Shoulders	79
E16	cattggcgactcaagtcaga	tgttctgccgaagacacttg		maker-Fvb2-1-augustus-gene-257.47-mRNA-1	2019-07-15	No					80							80	79.5
G01	cggtgctgttcttcgttacta	agagagagagagagagagagaga	GCAGGAGTGTCCTTCCCTTTCTTCTT	maker-Fvb2-4-augustus-gene-220.42-mRNA-1, maker-Fvb2-4-augustus-gene-220.42-mRNA-1_v1.0.a1 (mRNA) Fragaria x ananassa	2019-11-22	No	0				0		0					0						0				0						0		0
G02	cgtctgtacttgcaggctta	caagagaggagagtttgcagag	AGGAAGAGCTGTAGACTGAGATGGCT	GenBank: EU155163.1, MYB10 gene	2019-11-22	No	75				75						75 in 2/3	0	0					0 with shoulders				0						0		0
G03	agcaacatgacgtcatatatccact	gaatacaaatttgtattgtacccca	TGCACTTGCTCATGATCGTGGTTTAAATAGATT	Blueberry, Yang et al 2019	2019-11-22	Yes	76.5				76.5						0 with shoulders	0 with shoulders	0 with shoulders					0 with shoulders				0 with shoulders						0 with shoulders
G04	gttattcgttggaaccgtaggaa	gactgaaaaaactgcatttgtga	ATTATCCAAATTGTTAACCCCGTCCATAAACCT	Raspberry, Yang et al 2019	2019-11-22	Yes	0 with shoulders				0 with shoulders						0 with shoulders	0 with shoulders	0 with shoulders					0 with shoulders				0 with shoulders						0 with shoulders		0 with shoulders
G05	gctgaagcagctactttcgaagtaaca	aggagccgtgtgagatgaaagtctca	TGGAGTGGGAGAGTCAGAGTCGAAAAGAGG	Endogenous fruit marker, Yang et al 2019	2019-11-22	Yes	0 with shoulders				0 with shoulders						0 with shoulders	0 with shoulders	0 with shoulders					0 with shoulders				0 with shoulders						0 with shoulders		0 with shoulders
G06	gaggttgttccaccgttagat	attcacgatgatgacggtgg	TGGCACTGTCAAAGCCTACTTCGT	Chen, Yu, Tang, & Wang 2012. GenBank: JQ068826.1	2019-11-22	Yes	0 with shoulders				0 with shoulders						0 with shoulders	0 with shoulders	74.5					0 with shoulders				0 with shoulders						0 with shoulders		0 with shoulders
H01	ccccttgcttggagttcaag	gacggagacaccgattgctatt		GenBank: AX025475	2019-12-05	No	77.5	77.5					0				77.5 for 2/3	77.5 for 1/3	75					0				0						0		0
H02	catgcttcacttcttgccaaaa	aaacgacaccttgctttgca		GenBank: AF039183	2019-12-05	No	0 with shoulders						0 with shoulders				0 with shoulders	0 with shoulders	77.5 with shoulders					0 with shoulders				0						0		0
H03	cgtcaaagcaccgggagata	ggttgagcgccccatatg		GenBank: AF380299	2019-12-05	No	Need to re-run				83						Need to re-run	82.5	75					0 with shoulders				83 with shoulders						83		0
H04	ccagcggattcaagcttaacc	gccttacaccacaccggatt		GenBank: AJ315844	2019-12-05	No	Shoulders				83		83				83	83	77					0 with shoulders				83						83		0
H05	cgggtcccatgcgtaaag	acttgtggccgttgattgtg		GenBank: AF159563	2019-12-05	No	77				77		77	77			77		76					0				76 with shoulders						76 with shoulders		0
H06	gctatgcacgtggttacaagga	tggtgatgcatgtgcacaaa		GenBank: AF304366	2019-12-05	No	75				75			76			76		0					0				80 small peak						80 small peak		0
H07	gggaagcccgaattcaca	cccgggtggtgcttca		GenBank: AF237954	2019-12-05	No	shoulders				shoulders		86	shoulders			86 with shoulders		86 with shoulders					85				86 with shoulders						86 with shoulders		0
H08	acaggaaaccggtggtgaag	ccgccacctgggaaatagt		GenBank: AF237955	2019-12-05	No	77				77		83	77			83		0					0				83						83		0
H09	tttggaggctgtgggacttc	tcgagttctgaatgtcaacaaaattt		GenBank: BV681272	2019-12-05	No	76				76		76	76			76		0					0										0		0
H11	caatggcactactggcgacat	ccgggcggtgagtttg		GenBank: AF239687	2019-12-06	No	shoulders				Shoulders		shoulders	shoulders			shoulders		shoulders					shoulders				shoulders						shoulders		shoulders
H12	catgctcctcctccagaactg	cgaggcgccgaggaat		GenBank: AF239686	2019-12-06	No	80						80 with shoulders	80			80 with shoulders		80 with shoulders					shoulders				shoulders						shoulders		shoulders
H13	ttccaaagctcggcaaagag	gggctgaccccattcctta		GenBank: EF694717	2019-12-06	No	78			78 with shoulders	78		shoulders				shoulders		0					0				0						0		0
H14	caaagaccctttcctgcattatg	cgaaccgtttgaagccaaaa		GenBank: MH551878	2019-12-06	No	0	0					0				0		0					0		74	74	74	74		74	74	74	74	74	74	74	74	74	74
I06	gtggtcacttcgggacaact	agtttctgatcgccgaagaa		GenBank: AY695816.1	2019-07-24	Yes		83 with shoulders										80 with shoulders		74 with shoulders
I08.1	caacgaggccatatccaagt	ttcttaggccaaaagcggta		GenBank: DQ834905.1	2019-07-24	No		81										dromedary hump		shoulders
I12	tcttcgggtcaagccatatc	gcccaacagcattacctgat		GenBank: AF339025.1	2020-07-24	yes		0											80.5 with shoulder	0	81 with shoulder		0	0
Sberry	ggattcttcctggttgagacc	ccggctaccttatggttcttc		Dong et al. 2015 via Diepenbrock et al. 2018	2020-06-18	No			76							76.5						77	77	77	shoulders
